# Supplementary material
Source: publisher figshare collection journal article supplement (https://gsajournals.figshare.com/articles/dataset/_/14498556)
Supplement: Supplementary file 1 [file 1]

## Sheet: Sheet1
Data type	Experimental species	Symbol/name used in publication	Source – public	Source – published	Source – unpublished	Identifiers	New reagent	Comments
Data type (mandatory) Duplicate rows as needed. Order is flexible, but row titles must be preserved.	Experimental species (mandatory, "NA" okay)	Symbol/name used in publication (mandatory)	Source – public [stock center; company, data repository] (one of D,E,F mandatory)	Source -- published [PMID or 'this paper'] (one of D,E,F mandatory)	Source – unpublished [description, incl. lab of origin] (one of D,E,F mandatory)	Identifiers [format as ID_source:identifier] Separate multiple entries with semi-colon, space	New reagent (mandatory for new entities) Description, progenitor(s)	Comments (optional) Genotypes, purpose of reagent, additional information
gene (source not applicable)	Pristionchus pacificus	Ppa-hsd-2	NA	NA	NA	WormBase_ID:WBGene00099693; PPA10139
	Pristionchus pacificus	Ppa-obi-1	NA	NA	NA	WormBase_ID:WBGene00090091; PPA00537
	Pristionchus pacificus	Ppa-daf-12	NA	NA	NA	WormBase_ID:WBGene00118202; PPA28648
	Pristionchus pacificus	Ppa-odr-3	NA	NA	NA	WormBase_ID:WBGene00103743; PPA14189
	Pristionchus pacificus	Ppa-odr-7	NA	NA	NA	WormBase_ID:WBGene00089978; PPA00424
	Pristionchus pacificus	Ppa-che-1	NA	NA	NA	WormBase_ID:WBGene00090697; PPA01143
	Pristionchus pacificus	Ppa-F35D2.6	NA	NA	NA	WormBase_ID:WBGene00273453; PPA35084
	Pristionchus pacificus	Ppa-twk-2	NA	NA	NA	WormBase_ID:WBGene00099698; PPA10144
strain, strain_background	Pristionchus pacificus	PS312	Caenorhabditis Genetics Center (CGC)			RRID:WB-STRAIN:WBStrain00042002; WBStrain00047433		Wild type Pristionchus pacificus strain.
	Pristionchus pacificus	Ppa-obi-1 (tu404)		PMID: 25317948		tu404		Ppa-obi-1 mutant, defective iin ZTDO odor attraction
	Pristionchus pacificus	Ppa-dfc-1 (tu391)		PMID: 19110431		tu391		Ppa-dfc-1 mutant, dauer constitutive phenotype.
	Pristionchus pacificus	Ppa-hsd-2 (csu60)		This paper		csu60	Ppa-hsd-2 mutant, deletion on Chromosome I, dauer constitutive phenotype.	Ppa-hsd-2 allele, dauer constitutive phenotype.
	Pristionchus pacificus	Ppa-daf-12 (tu389)		PMID: 19110431		tu389		Ppa-daf-12 mutant, dauer defective phenotype.
	Pristionchus pacificus	Ppa-hsd-2 (csu88)		This paper		csu88	Ppa-hsd-2 mutant, deletion on Chromosome I, dauer constitutive phenotype.	Ppa-hsd-2 allele, dauer constitutive phenotype.
	Pristionchus pacificus	rlh177 (tu391; tu404)		This paper		rlh177	Ppa-dfc-1; Ppa-obi-1 double mutant.
	Pristionchus pacificus	rlh192 (csu60; tu404)		This paper		rlh192	Ppa-hsd-2; Ppa-obi-1 double mutant.
	Pristionchus pacificus	Ppa-dfc-1; Ppa-daf-12		This paper		rlh205(tu391;tu389)	Ppa-dfc-1; Ppa-daf-12 double mutant.	dauer constitutive
	Pristionchus pacificus	Ppa-hsd-2; Ppa-daf-12		This paper		rlh204 (csu60;tu389)	Ppa-hsd-2; Ppa-daf-12 double mutant.	dauer constitutive
	Pristionchus pacificus	tuEx265 (Ppa-odr-3p::rfp), PS312		PMID: 31526477		tuEx265		PS312 expressing Ppa-odr-3p::rfp
	Pristionchus pacificus	tuEx297 (Ppa-odr-7p::rfp), PS312		PMID: 31526477		tuEx297		PS312 expressing Ppa-odr-7p::rfp
	Pristionchus pacificus	lucEx367 (Ppa-che-1p::rfp), PS312		PMID: 31526477		lucEx367		PS312 expressing Ppa-che-1p::rfp
	Pristionchus pacificus	csuEx56 (PS312 gDNA; Ppa-hsd-2p::rfp; Ppa-egl-20p::turbo:rfp)		This paper		csuEx56	PS312 expressing Ppa-hsd-2p::rfp
	Pristionchus pacificus	csuEx57 (PS312 gDNA; Ppa-hsd-2p::rfp; Ppa-egl-20p::turbo:rfp)		This paper		csuEx57	PS312 expressing Ppa-hsd-2p::rfp
	Pristionchus pacificus	tu391; Ppa-daf-6p::rfp		This paper		rlh178	tu391 expressing Ppa-daf-6p::rfp
	Pristionchus pacificus	csu88; Ppa-che-1p::rfp		This paper		rlh227	csu88 expressing Ppa-che-1p::rfp
	Pristionchus pacificus	csu88; Ppa-odr-3p::rfp		This paper		rlh228	csu88 expressing Ppa-odr-3p::rfp ectopically
	Pristionchus pacificus	csu60; Ppa-odr-3p::rfp		This paper		rlh211	csu60 expressing Ppa-odr-3p::rfp ectopically
	Pristionchus pacificus	csu60; Ppa-odr-7p::rfp		This paper		rlh197	csu60 expressing Ppa-odr-7p::rfp
	Pristionchus pacificus	csu60; Ppa-che-1p::rfp		This paper		rlh212	csu60 expressing Ppa-che-1p::rfp
	Pristionchus pacificus	RS5278 (Bolivia)		PMID: 28684461				Mapping strain.
	Pristionchus pacificus	csuEx54 (csu60 gDNA; Ppa-hsd-2p::hsd-2 cDNA; Ppa-egl-20p::turbo:rfp)		This paper		csuEx54	csu60 expressing Ppa-hsd-2p::hsd-2 cDNA, the Ppa-hsd-2 rescue transgene.
	Caenorhabditis elegans	N2	Caenorhabditis Genetics Center (CGC)			RRID:WB-STRAIN:WBStrain00000001		Wild type Caenorhabditis elegans strain.
genetic reagent (in whole organism)
cell line
transfected construct (in cell line)
antibody
recombinant DNA reagent	Pristionchus pacificus	Ppa-hsd-2 rescue transgene, Ppa-hsd-2p::hsd-2 cDNA		This paper			Ppa-hsd-2p::hsd-2 cDNA - rescue transgene for Ppa-hsd-2. Plasmid.
	Pristionchus pacificus	Ppa-hsd-2p::rfp		This paper			Ppa-hsd-2p::rfp plasmid.
	Pristionchus pacificus	Ppa-egl-20p::rfp		This paper			Ppa-egl-20p::rfp plasmid.
sequence-based reagent
peptide, recombinant protein
large-scale dataset	Pristionchus pacificus	csu60 whole genome sequence		This paper		DOI: 10.6084/m9.figshare.14298290	Whole genome sequencing data files for csu60.
commercial assay	NA
chemical compound, drug	NA	∆7-dafachronic acid	Cayman Chemical			Item Number: 14101; CAS Number: 949004-12-0
	NA	(Z)-7-tetradece-2-one (ZTDO)	Bedoukian Research Inc. (Bio)	PMID: 18509055		BRI Product Number: P6140-95; CAS Number: 146955-45-5
	NA	methyl myristate	ACROS Organics	PMID: 17141618		Catalog number: 165010025; CAS Number: 124-10-7
	NA	(E)-11-tetradecenyl acetate (ETDA)	Sigma-Aldrich	PMID: 17141618		Catalog number: T2143; CAS Number: 33189-72-9
	NA	(Z)-11-hexadecenal	Sigma-Aldrich	PMID: 17141618		Catalog number: 249084;CAS Number 53939-28-9
	NA	2-(E)-nonenol	Bedoukian Research Inc. (Bio)	PMID: 17141618		BRI Product Number: 190; CAS Number: 31502-14-4
	NA	ß-caryophyllene	Sigma-Aldrich	PMID: 17141618		Catalog Number: C-9653; CAS Number: 87-44-5
	NA	Latex fluorescent beads	Sigma-Aldrich	PMID: 27172224		Catalog number: L3280
software, algorithm	NA	Graphpad Prism 8	Graphpad			RRID:SCR_002798
	NA	Microsoft Excel	Microsoft			RRID:SCR_016137
	NA	T-COFFEE		PMID: 10964570		RRID:SCR_011818
	NA	Maximum Likelihood Phylogeny by PhyML (http://www.phylogeny.fr)		PMID: 18424797		RRID:SCR_010266
	NA	www.Pristionchus.org		PMID: 17062617		RRID:SCR_003414
	NA	www.wormbase.org		PMID: 11125056		RRID:SCR_003098
other
