# Supplementary material
Source: publisher figshare collection journal article supplement (https://gsajournals.figshare.com/articles/dataset/_/14498556)
Supplement: Supplementary file 3 [file 1]

**SM Table 4 : Primers**

| Primer  | Sequence (5'>3')                                     | Target and Purpose                                                                                                                                                |
|---------|------------------------------------------------------|-------------------------------------------------------------------------------------------------------------------------------------------------------------------|
| RHL927  | AGGGAAATGCAGCGCGAG                                   | <i>Ppa-hsd-2</i> cDNA                                                                                                                                             |
| RHL930  | GAGGCACGAGCAACTTGG                                   | <i>Ppa-hsd-2</i> cDNA                                                                                                                                             |
| RHL1006 | TTCTCCTTCAGGCAAACCTCGTAG                             | Genotyping the <i>csu60</i> deletion                                                                                                                              |
| RHL1007 | TACGGTATCGCGGTTGGGTATCG                              | Genotyping the <i>csu60</i> deletion                                                                                                                              |
| RHL1012 | TAGGAGATCTTCTAGAAAGAACAA<br>GCTCACTAACCAGTG          | <i>Ppa-hsd-2</i> promoter for rescue construct                                                                                                                    |
| RHL1013 | GTTGGTGCATTTTTACTAGAATTTA<br>CGATAGGAAATAG           | <i>Ppa-hsd-2</i> promoter for rescue construct                                                                                                                    |
| RHL1014 | TCTAGTAAAAATGCACCAACGCTG<br>CTGC                     | <i>Ppa-hsd-2</i> cDNA for rescue construct                                                                                                                        |
| RHL1015 | TAACAATCAACAATAACAATTCATTT<br>GAAGTAGAAAAACAACACAGCC | <i>Ppa-hsd-2</i> cDNA for rescue construct                                                                                                                        |
| RHL1016 | ACTTCGAATCTTCTCGACGCATC                              | Genotyping the <i>csu60</i> deletion. Amplicon present only in wildtype.                                                                                          |
| RHL1097 | GTTGATAAGGAACAACAGCAGCG                              | <i>Ppa-odr-3</i> qPCR primer for exon 2                                                                                                                           |
| RHL1098 | CCGCATTCTCCAGCTCCTAAC                                | <i>Ppa-odr-3</i> qPCR primer for exon 2                                                                                                                           |
| RHL1099 | GAATCGTTTTCAATAACACGGTCA<br>C                        | <i>Ppa-odr-3</i> qPCR primer for exon 5                                                                                                                           |
| RHL1100 | AATCATAGCTTTCTCGGGCTCC                               | <i>Ppa-odr-3</i> qPCR primer for exon 5                                                                                                                           |
| RHL1066 | TTTTACTAGAATTTACGATAGGAAAT<br>AG                     | Gibson Assembly vector backbone containing <i>Ppa-hsd-2</i> promoter and <i>Ppa-rpl-23</i> 3'UTR, for <i>Ppa-hsd-2p::turbo RFP</i> reporter.                      |
| RHL1067 | TATCGTAAATTCTAGTAAAAATGAG<br>CGAGCTGATCAAG           | Gibson Assembly of turbo RFP with overlap to <i>Ppa-hsd-2</i> promoter to make <i>Ppa-hsd-2p::turbo RFP</i> reporter.                                             |
| RHL1068 | TAACAATCAACAATAACAATTCATC<br>TGTGCCCCAGTTTG          | Gibson Assembly of turbo RFP with overlap to <i>rpl-23</i> 3'UTR to make <i>Ppa-hsd-2p::turbo RFP</i> reporter.                                                   |
| RHL1177 | GAATTCTGATCCGGGTTTAGC                                | For genotyping <i>Ppa-hsd-2(csus88)</i> . When combined with RHL1133, Amplicon present in wildtype but fails in <i>csus88</i> . (595 bp amplicon)                 |
| RHL1155 | TTGATGAAGGACGTTCTACTGC                               | Reverse primer 3' of RHL1134 on <i>Ppa-hsd-2</i> . When combined with RHL1133, the amplicon is present in wildtype but fails in <i>csus88</i> . (932 bp amplicon) |
| RHL1112 | ACTCGTTTCACCGAGGCG                                   | For genotyping <i>Ppa-hsd-2</i> CRISPR/cas-9 alleles                                                                                                              |
| RHL1133 | GGGAACACACATTGACCAATCG                               | For genotyping <i>Ppa-hsd-2</i> CRISPR/cas-9 alleles                                                                                                              |

|         |                       |                                                      |
|---------|-----------------------|------------------------------------------------------|
| RHL1134 | CGCAGTCCAGAGTTCAGAGGC | For genotyping <i>Ppa-hsd-2</i> CRISPR/cas-9 alleles |
| RHL1109 | CAACGCTGCTGCATCATCGG  | <i>Ppa-hsd-2</i> crRNA 1                             |
| RHL1185 | CTTTGGGCAGCATGTCGCCA  | <i>Ppa-hsd-2</i> crRNA 2                             |
| RHL931  | TGGAGTACGATGACCTCG    | PPA35084 cDNA                                        |
| RHL934  | GGTTGGCAGTTGTCCATC    | PPA35084 cDNA                                        |
| RHL1198 | CGCGATGACCAAAGGCGAC   | <i>Ppa-tw-2</i> cDNA                                 |
| RHL1199 | TCGAGGTCGACACTAGACTGG | <i>Ppa-tw-2</i> cDNA                                 |
