# Supplementary material
Source: publisher figshare collection journal article supplement (https://gsajournals.figshare.com/articles/dataset/_/14498556)
Supplement: Supplementary file 4 [file 1]

**SM Table 1.** Phenotype frequency in Daf-c mutants

| Strain                                                    | Daf-c DL <sup>a</sup><br>±SEM (%)<br>@25°C | N        | Active DL<br>±SEM (%)<br>@20°C | Mlt defect<br>±SEM (%)<br>@20°C | J2d<br>±SEM (%)<br>@20°C | N        | Daf-c DL <sup>a</sup><br>±SEM<br>(%)@15°C | N        |
|-----------------------------------------------------------|--------------------------------------------|----------|--------------------------------|---------------------------------|--------------------------|----------|-------------------------------------------|----------|
| <b>Wild-type PS312</b>                                    | 0                                          | 724(8)   | 0                              | 0                               | 0                        | 961(8)   | ND                                        |          |
| <i>hsd-2(csu60)</i>                                       | 67±9.4                                     | 2516(11) | 53 ±6.8                        | 6 ±1.3 <sup>b</sup>             | 15 ±2.5                  | 2846(8)  | 6.7 ±2.1                                  | 1090(7)  |
| <i>hsd-2(csu60)</i> + Δ7-DA                               | ND                                         |          | 0                              | 0                               | 0                        | 1330(12) | ND                                        |          |
| <i>hsd-2(csu60); daf-12(tu389)</i>                        | 0                                          | 1172 (6) | 0                              | 3.7 ±3.4 <sup>c</sup>           | 0                        | 808(6)   | ND                                        |          |
| <i>daf-12(tu389)</i>                                      | 0                                          | 1250(7)  | 0                              | 0                               | 0                        | 950(7)   | ND                                        |          |
| <i>hsd-2(csu60); csuEx54[Ppa-<br/>hsd-2p::hsd-2 cDNA]</i> | ND                                         |          | 11 ±2.5                        | 0                               | ND                       | 2388(6)  | ND                                        |          |
| <i>hsd-2(csu88)</i>                                       | 91 ±2.0                                    | 2160(15) | 76 ±1.7                        | 8 ±1.0                          | 14 ±2.0                  | 1369(8)  | 94 ±1.7                                   | 2762(10) |
| <i>hsd-2(csu88)</i> + Δ7-DA                               | ND                                         |          | 0                              | 0                               | 0                        | 1062(11) | ND                                        |          |
| <i>dfc-1(tu391)</i>                                       | 96 ±0.9                                    | 1520(7)  | 28 ±3.5                        | 25 ±2.6 <sup>b</sup>            | 0                        | 1742(11) | 0                                         | 577(7)   |
| <i>dfc-1(tu391); daf-12(tu389)</i>                        | 0                                          | 1005(7)  | 0                              | 0                               | 0                        | 1003(7)  | ND                                        |          |
| <i>dfc-1(tu391)</i> + Δ7-DA                               | 0                                          | 426(4)   | ND                             | ND                              | ND                       |          | ND                                        |          |

Values based on the synchronized progeny of 10-15 gravid hermaphrodites scored 5 days later (25°C and 20°C) or 11 days later (15°C).

<sup>a</sup>Includes both active and exsheathment defective incarcerated dauer larvae formed under reproductive conditions among all J3-equivalent larvae.

<sup>b</sup>Transient exsheathment defective Daf-c dauers; no molting defect was found in non-dauers.

<sup>c</sup>Transient molting defect in J3-J4 or J4-Adult molts.

N: sample size with the number of experiments is given in parentheses.

ND: not determined

SEM: standard error of the mean
