# Supplementary material
Source: publisher figshare collection journal article supplement (https://gsajournals.figshare.com/articles/dataset/_/14498556)
Supplement: Supplementary file 7 [file 1]

**SM Table 3.** *Ppa-odr-3p::rfp* expression in *Ppa-hsd-2* mutants

| Strain                                      | Stage                     | No. Expression two pairs<br>AM3(AWA) + AM4(ASK) | No. Expression three pairs<br>AM3+ AM4 + unknown (%) | N  |
|---------------------------------------------|---------------------------|-------------------------------------------------|------------------------------------------------------|----|
| <b>PS312 wildtype</b>                       | J2                        | 10                                              | 0 (0%)                                               | 10 |
|                                             | Dauer                     | 22                                              | 0 (0%)                                               | 22 |
|                                             | J4/adult*                 | 17                                              | 0 (0%)                                               | 17 |
| <b><i>Ppa-hsd-2(csu60)</i></b>              | J2**                      | 17                                              | 12 (41%)                                             | 29 |
|                                             | Dauer                     | 24                                              | 4 (14%)                                              | 28 |
|                                             | J4/adult                  | 10                                              | 21 (68%)                                             | 31 |
| <b><i>Ppa-hsd-2(csu60)</i></b>              | Adult (-DA <sup>^</sup> ) | 28                                              | 9 (24%)                                              | 37 |
| <b><math>\Delta 7</math>-DA<sup>a</sup></b> | Adult (+DA)               | 26                                              | 4 (13%)                                              | 30 |
| <b><i>Ppa-hsd-2(csu88)</i></b>              | J4/adult                  | 14                                              | 24 (63%)                                             | 38 |
|                                             | Dauer                     | 8                                               | 2 (20%)                                              | 10 |

\*An additional 22 adults with the same expression pattern were observed in Hong *et al*, *eLife*, 2019

\*\*Including some partial dauers that had darkened intestines but did not have buccal caps and radial constriction.

<sup>^</sup>ethanol vehicle control; N: sample size

<sup>a</sup>  $\Delta 7$ -DA did not affect *Ppa-odr-3p::rfp* amphid neuron expression (P=0.22, Fisher's Exact Test)
