# Supplementary material
Source: publisher figshare collection journal article supplement (https://gsajournals.figshare.com/articles/dataset/_/14498556)
Supplement: Supplementary file 8 [file 1]

**SM Table 2.** *Ppa-hsd-2p::rfp* expression by developmental stage

| Strain                | Stage    | CAN neurons | Excretory Gland | Excretory Canal | Intestine | N  |
|-----------------------|----------|-------------|-----------------|-----------------|-----------|----|
| <b><i>csuEx56</i></b> | J1       | 9 (100%)    | 0               | 0               | 1 (11%)   | 9  |
|                       | J2       | 9 (75%)     | 1 (8%)          | 0               | 11(92%)   | 12 |
|                       | Dauer    | 2 (50%)     | 4 (100%)        | 3 (75%)         | 4 (100%)  | 4  |
|                       | J4/adult | 10 (100%)   | 8 (80%)         | 0               | 8 (80%)   | 10 |
| <b><i>csuEx57</i></b> | J1       | 0           | 0               | 0               | 2 (50%)   | 4  |
|                       | J2       | 13 (93%)    | 0               | 0               | 6 (43%)   | 14 |
|                       | Dauer    | 4 (67%)     | 3 (50%)         | 3 (50%)         | 0         | 6  |
|                       | J4/adult | 22 (85%)    | 13 (50%)        | 0               | 12 (46%)  | 26 |

The *P. pacificus* J1 larva is a pre-hatching stage. Counts (percentage with tissue-specific expression) in two independent extrachromosomal reporter strains. N: sample size. Total number of samples: 85.
