# Supplementary material
Source: publisher figshare collection journal article supplement (https://gsajournals.figshare.com/articles/dataset/_/14498556)

# qPCR (*Ppa-odr-3*)

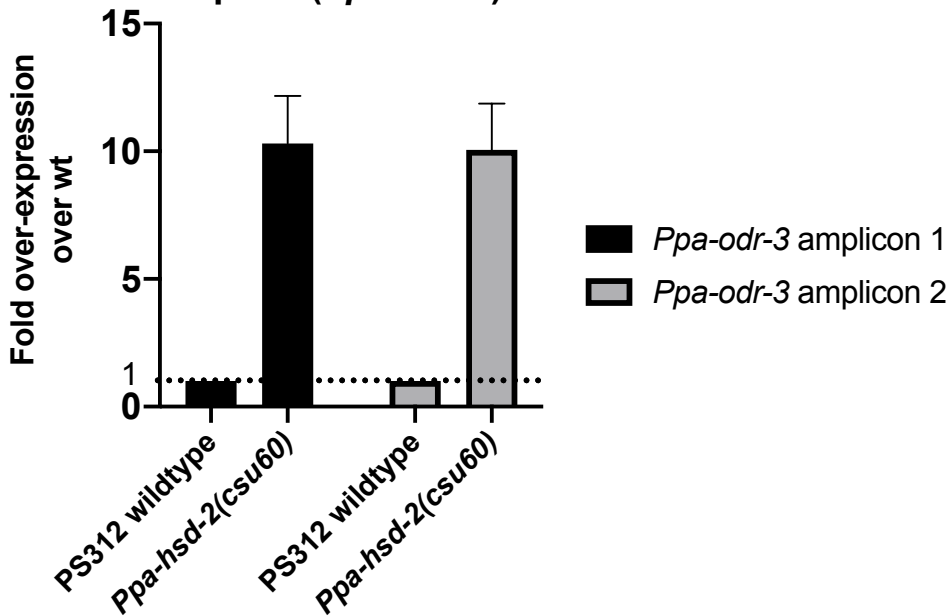

Supplement: Supplementary file 1 [file 1]

# Progress of isolated pre-dauer J2d

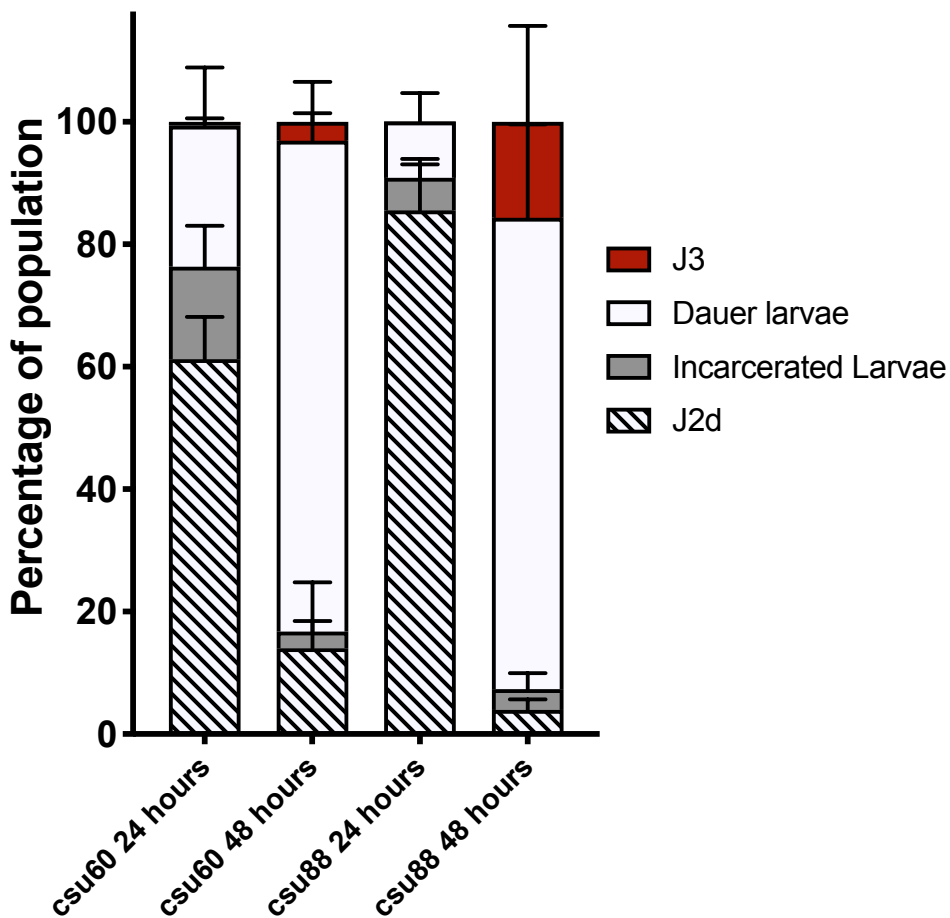

Supplement: Supplementary file 2 [file 1]

A

## Other Insect and plant volatiles

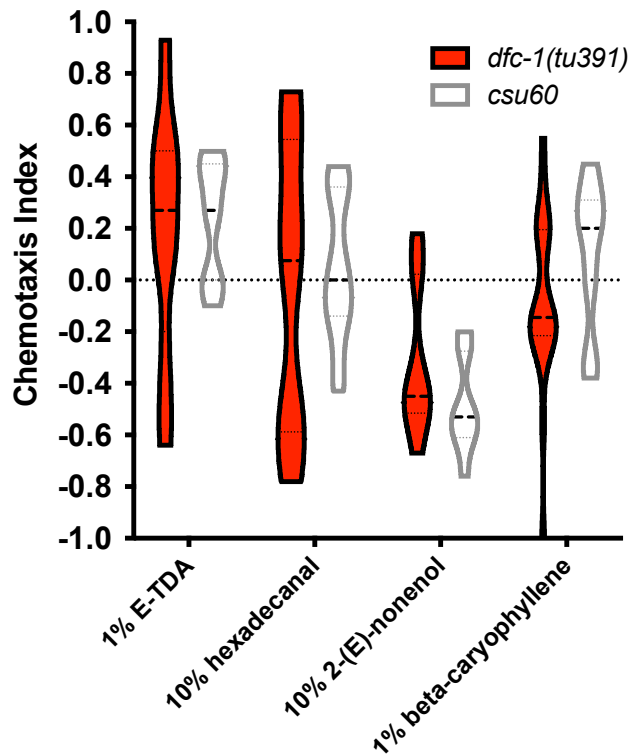

B

## Low MW odors

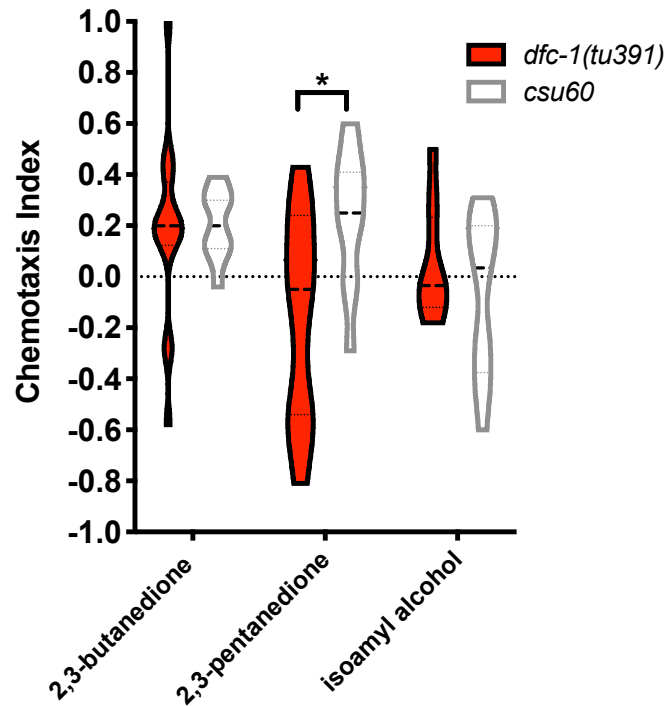

Supplement: Supplementary file 5 [file 1]

## Response to Temperature

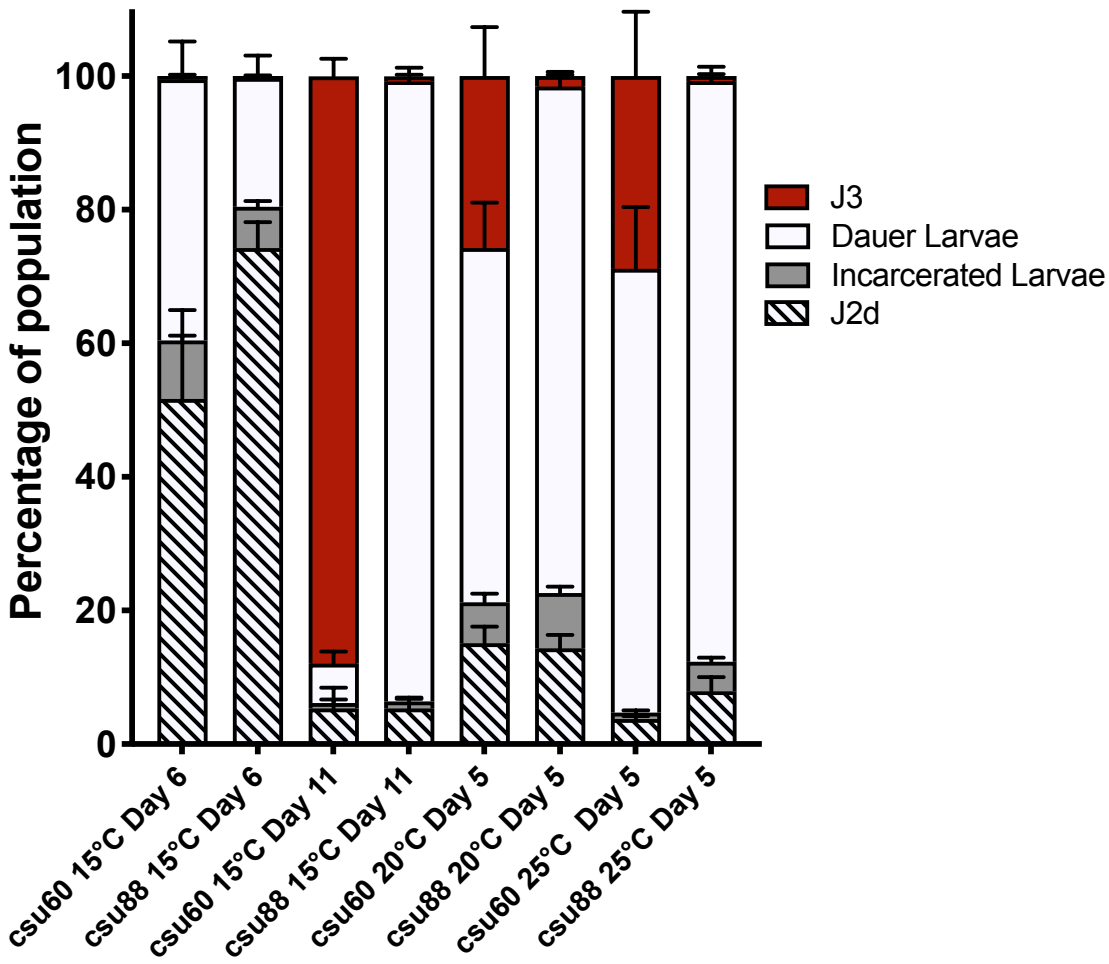

Supplement: Supplementary file 6 [file 1]
